# Supplementary material
Source: PubMed Central journal article supplement (PMC3150488)
Supplement: NIHMS313480-supplement-Supplement1.pdf [file NIHMS313480-supplement-Supplement1.pdf]

## Supplementary Appendix

This appendix has been provided by the authors to give readers additional information about their work.

Supplement to: Finks JF, Osborne NH, Birkmeyer JD. Trends in hospital volume and operative mortality for high-risk surgery. *N Engl J Med* 2011;364:2128-37.

Table 1 (Supplement). Trends in Medicare procedure volumes and the proportion of Medicare patients treated in high-volume hospitals for cancer and cardiovascular operations, 1999-2008

|                                                                             | Year      |            |            |            |            |
|-----------------------------------------------------------------------------|-----------|------------|------------|------------|------------|
|                                                                             | 1999-2000 | 2001-2002  | 2003-2004  | 2005-2006  | 2007-2008  |
| <b>Esophagectomy</b>                                                        |           |            |            |            |            |
| Patients, n                                                                 | 8805      | 8864       | 8694       | 8674       | 8719       |
| Hospitals, n                                                                | 1734      | 1632       | 1524       | 1403       | 1309       |
| Hospital Volume, median (IQR)                                               | 4 (2-10)  | 5 (2-11)   | 5 (2-14)   | 7 (3-16)   | 7 (3-17)   |
| Proportion of patients treated in hospital within top decile by volume, %   | 39        | 40         | 43         | 45         | 44         |
| Proportion of patients treated in hospital within top quintile by volume, % | 52        | 52         | 55         | 60         | 59         |
| <b>Pancreatectomy</b>                                                       |           |            |            |            |            |
| Patients, n                                                                 | 6633      | 7486       | 8215       | 8932       | 10350      |
| Hospitals, n                                                                | 1308      | 1303       | 1110       | 1016       | 978        |
| Hospital Volume, median (IQR)                                               | 5 (2-14)  | 6 (2-17)   | 10 (3-22)  | 13 (4-28)  | 16 (5-35)  |
| Proportion of patients treated in hospital within top decile by volume, %   | 42        | 46         | 49         | 51         | 52         |
| Proportion of patients treated in hospital within top quintile by volume, % | 59        | 58         | 63         | 66         | 69         |
| <b>Lung Resection</b>                                                       |           |            |            |            |            |
| Patients, n                                                                 | 49056     | 49723      | 51362      | 53456      | 56307      |
| Hospitals, n                                                                | 2408      | 2285       | 2200       | 2096       | 2045       |
| Hospital Volume, median (IQR)                                               | 18 (9-32) | 19 (10-35) | 21 (10-37) | 23 (11-42) | 25 (12-49) |
| Proportion of patients treated in hospital within top decile by volume, %   | 39        | 40         | 39         | 41         | 41         |
| Proportion of patients treated in hospital within top quintile by volume, % | 58        | 57         | 58         | 59         | 59         |

|                                                                             | <b>Year</b>      |                  |                  |                  |                  |
|-----------------------------------------------------------------------------|------------------|------------------|------------------|------------------|------------------|
|                                                                             | <b>1999-2000</b> | <b>2001-2002</b> | <b>2003-2004</b> | <b>2005-2006</b> | <b>2007-2008</b> |
| <b>Cystectomy</b>                                                           |                  |                  |                  |                  |                  |
| Patients, n                                                                 | 11258            | 11593            | 11953            | 12278            | 13167            |
| Hospitals, n                                                                | 1817             | 1723             | 1607             | 1505             | 1366             |
| Hospital Volume, median (IQR)                                               | 5 (2-10)         | 6 (3-13)         | 6 (3-16)         | 8 (3-22)         | 10 (4-27)        |
| Proportion of patients treated in hospital within top decile by volume, %   | 35               | 40               | 43               | 47               | 47               |
| Proportion of patients treated in hospital within top quintile by volume, % | 54               | 54               | 55               | 61               | 65               |
| <b>AAA Repair</b>                                                           |                  |                  |                  |                  |                  |
| Patients, n                                                                 | 56333            | 66909            | 64645            | 67288            | 71170            |
| Hospitals, n                                                                | 2339             | 2159             | 2035             | 1949             | 1860             |
| Hospital Volume, median (IQR)                                               | 22 (11-42)       | 32 (15-62)       | 31 (16-56)       | 33 (17-58)       | 32 (17-57)       |
| Proportion of patients treated in hospital within top decile by volume, %   | 40               | 44               | 42               | 40               | 37               |
| Proportion of patients treated in hospital within top quintile by volume, % | 60               | 63               | 61               | 60               | 57               |
| <b>CABG</b>                                                                 |                  |                  |                  |                  |                  |
| Patients, n                                                                 | 393043           | 376016           | 337430           | 284252           | 256716           |
| Hospitals, n                                                                | 1073             | 1095             | 1142             | 1172             | 1195             |
| Hospital Volume, median (IQR)                                               | 244 (139-408)    | 214 (129-366)    | 179 (110-304)    | 148 (90-249)     | 130 (80-216)     |
| Proportion of patients treated in hospital within top decile by volume, %   | 32               | 31               | 31               | 31               | 30               |
| Proportion of patients treated in hospital within top quintile by volume, % | 50               | 49               | 48               | 48               | 47               |

|                                                                             | <b>Year</b>      |                  |                  |                  |                  |
|-----------------------------------------------------------------------------|------------------|------------------|------------------|------------------|------------------|
|                                                                             | <b>1999-2000</b> | <b>2001-2002</b> | <b>2003-2004</b> | <b>2005-2006</b> | <b>2007-2008</b> |
| <b>Carotid Endarterectomy</b>                                               |                  |                  |                  |                  |                  |
| Patients, n                                                                 | 232388           | 232103           | 222168           | 190906           | 178070           |
| Hospitals, n                                                                | 2635             | 2550             | 2502             | 2415             | 2341             |
| Hospital Volume, median (IQR)                                               | 77 (40-131)      | 78 (40-130)      | 75 (40-125)      | 67 (36-109)      | 64 (35-105)      |
| Proportion of patients treated in hospital within top decile by volume, %   | 39               | 38               | 37               | 37               | 35               |
| Proportion of patients treated in hospital within top quintile by volume, % | 59               | 58               | 57               | 57               | 55               |
| <b>Aortic Valve Replacement</b>                                             |                  |                  |                  |                  |                  |
| Patients, n                                                                 | 74541            | 80223            | 85556            | 87421            | 95033            |
| Hospitals, n                                                                | 1013             | 1064             | 1105             | 1139             | 1161             |
| Hospital Volume, median (IQR)                                               | 53 (28-99)       | 54 (29-105)      | 57 (30-104)      | 53 (29-102)      | 60 (31-108)      |
| Proportion of patients treated in hospital within top decile by volume, %   | 37               | 37               | 37               | 37               | 38               |
| Proportion of patients treated in hospital within top quintile by volume, % | 55               | 55               | 55               | 54               | 56               |

Table 2 (Supplement). Procedure-specific patient characteristics, major co-morbidities and predicted mortality rates\* among Medicare patients, 1999-2008

|                             | Year       |            |            |            |            |
|-----------------------------|------------|------------|------------|------------|------------|
|                             | 1999-2000  | 2001-2002  | 2003-2004  | 2005-2006  | 2007-2008  |
| <b>Esophagectomy</b>        |            |            |            |            |            |
| Demographics                |            |            |            |            |            |
| Age, mean (SD)              | 72.3 (8.1) | 72.1 (8.2) | 72.0 (8.4) | 71.8 (8.4) | 71.7 (8.3) |
| Female, %                   | 28.2       | 27.4       | 28.0       | 27.9       | 26.8       |
| non-White, %                | 12.0       | 12.5       | 12.8       | 11.5       | 11.7       |
| Comorbidities               |            |            |            |            |            |
| 3+ Comorbidities, %         | 28.1       | 29.8       | 31.5       | 34.2       | 30.0       |
| Congestive heart failure, % | 8.7        | 9.3        | 9.0        | 8.7        | 5.6        |
| Hypertension, %             | 30.5       | 33.2       | 36.6       | 38.7       | 38.2       |
| Diabetes, %                 | 11.5       | 12.0       | 12.5       | 13.2       | 13.4       |
| Chronic lung disease, %     | 21.3       | 21.3       | 23.1       | 22.7       | 17.1       |
| Renal Failure, %            | 1.3        | 1.9        | 1.9        | 3.7        | 4.0        |
| Predicted mortality, %      | 9.7        | 9.5        | 9.3        | 9.6        | 9.3        |
| (95% CI)                    | (9.5-9.9)  | (9.3-9.7)  | (9.1-9.5)  | (9.4-9.9)  | (9.1-9.5)  |
| <b>Pancreatectomy</b>       |            |            |            |            |            |
| Demographics                |            |            |            |            |            |
| Age, mean (SD)              | 71.5 (9.4) | 71.6 (9.3) | 71.8 (9.3) | 71.8 (9.3) | 71.8 (9.2) |
| Female, %                   | 49.1       | 50.0       | 48.9       | 49.7       | 50.1       |
| non-White, %                | 12.5       | 12.6       | 12.3       | 12.3       | 14.0       |
| Comorbidities               |            |            |            |            |            |
| 3+Comorbidities, %          | 25.0       | 27.2       | 30.4       | 33.4       | 33.4       |
| Congestive heart failure, % | 5.6        | 5.5        | 5.3        | 5.8        | 3.9        |
| Hypertension, %             | 33.8       | 37.8       | 41.8       | 44.3       | 44.8       |
| Diabetes, %                 | 19.3       | 19.1       | 20.6       | 20.6       | 20.2       |
| Chronic lung disease, %     | 1.6        | 2.0        | 1.9        | 2.6        | 7.1        |
| Renal Failure, %            | 2.9        | 2.7        | 3.6        | 4.9        | 5.2        |
| Predicted mortality, %      | 6.8        | 6.7        | 6.6        | 6.4        | 6.3        |
| (95% CI)                    | (6.7-7.1)  | (6.6-7.0)  | (6.4-6.7)  | (6.3-6.6)  | (6.1-6.4)  |
| <b>Lung Resection</b>       |            |            |            |            |            |
| Demographics                |            |            |            |            |            |
| Age, mean (SD)              | 72.2 (7.1) | 72.2 (7.2) | 72.3 (7.4) | 72.3 (7.6) | 72.3 (7.7) |
| Female, %                   | 44.0       | 45.2       | 45.9       | 47.4       | 48.4       |
| non-White, %                | 9.1        | 9.5        | 10.0       | 10.0       | 10.4       |
| Comorbidities               |            |            |            |            |            |
| 3+ Comorbidities, %         | 26.6       | 30.0       | 32.7       | 36.4       | 36.5       |
| Congestive heart failure, % | 5.6        | 6.1        | 6.1        | 6.1        | 4.7        |
| Hypertension, %             | 38.8       | 43.4       | 47.9       | 51.4       | 52.8       |
| Diabetes, %                 | 11.2       | 12.3       | 13.1       | 14.1       | 14.9       |
| Chronic lung disease, %     | 5.6        | 6.1        | 6.1        | 6.1        | 4.7        |
| Renal Failure, %            | 1.2        | 1.4        | 1.7        | 3.5        | 4.4        |
| Predicted mortality, %      | 4.8        | 4.7        | 4.7        | 4.7        | 4.7        |
| (95% CI)                    | (4.8-4.9)  | (4.7-4.8)  | (4.6-4.7)  | (4.7-4.8)  | (4.6-4.7)  |

|                             | Year       |            |            |            |            |
|-----------------------------|------------|------------|------------|------------|------------|
|                             | 1999-2000  | 2001-2002  | 2003-2004  | 2005-2006  | 2007-2008  |
| <b>Cystectomy</b>           |            |            |            |            |            |
| Demographics                |            |            |            |            |            |
| Age, mean (SD)              | 73.4 (7.9) | 73.3 (8.1) | 73.4 (8.0) | 73.5 (8.1) | 73.6 (8.0) |
| Female, %                   | 21.2       | 20.6       | 20.7       | 19.9       | 19.2       |
| non-White, %                | 7.2        | 7.7        | 8.0        | 7.9        | 7.1        |
| Comorbidities               |            |            |            |            |            |
| 3+ Comorbidities, %         | 20.8       | 23.2       | 27.1       | 30.9       | 35.3       |
| Congestive heart failure, % | 0.7        | 0.6        | 0.7        | 1.5        | 5.1        |
| Hypertension, %             | 34.1       | 37.4       | 42.7       | 45.2       | 47.5       |
| Diabetes, %                 | 11.8       | 12.7       | 13.9       | 13.7       | 15.4       |
| Chronic lung disease, %     | 20.3       | 20.5       | 21.2       | 21.3       | 17.1       |
| Renal Failure, %            | 2.1        | 2.2        | 3.0        | 6.8        | 7.9        |
| Predicted mortality, %      | 3.7        | 3.6        | 3.6        | 3.9        | 4.2        |
| (95% CI)                    | (3.7-3.8)  | (3.6-3.7)  | (3.6-3.7)  | (3.9-4.0)  | (4.1-4.3)  |
| <b>AAA Repair</b>           |            |            |            |            |            |
| Demographics                |            |            |            |            |            |
| Age, mean (SD)              | 74.4 (6.3) | 74.8 (6.5) | 75.0 (6.7) | 75.2 (6.9) | 75.4 (7.1) |
| Female, %                   | 23.8       | 21.5       | 21.8       | 21.5       | 21.7       |
| non-White, %                | 5.6        | 5.7        | 6.3        | 6.5        | 6.7        |
| Comorbidities               |            |            |            |            |            |
| 3+ Comorbidities, %         | 33.5       | 34.4       | 36.9       | 40.3       | 37.0       |
| Congestive heart failure, % | 12.0       | 11.0       | 10.6       | 10.4       | 3.6        |
| Hypertension, %             | 53.3       | 58.1       | 61.7       | 65.5       | 65.9       |
| Diabetes, %                 | 8.5        | 10.3       | 11.6       | 13.4       | 14.3       |
| Chronic lung disease, %     | 34.2       | 34.7       | 35.4       | 35.8       | 31.8       |
| Renal Failure, %            | 3.0        | 3.5        | 3.8        | 8.3        | 10.2       |
| Endovascular repair, %      | 3.6        | 35.2       | 47.6       | 62.2       | 73.3       |
| Predicted mortality, %      | 3.5        | 3.4        | 3.3        | 3.6        | 3.6        |
| (95% CI)                    | (3.5-3.6)  | (3.4-3.4)  | (3.3-3.4)  | (3.6-3.7)  | (3.6-3.7)  |
| <b>CABG</b>                 |            |            |            |            |            |
| Demographics                |            |            |            |            |            |
| Age, mean (SD)              | 72.4 (7.4) | 72.3 (7.6) | 72.2 (7.8) | 72.1 (7.9) | 71.9 (8.0) |
| Female, %                   | 34.5       | 34.0       | 33.1       | 31.9       | 31.6       |
| non-White, %                | 9.3        | 10.0       | 10.9       | 11.2       | 11.7       |
| Comorbidities               |            |            |            |            |            |
| 3+ Comorbidities, %         | 30.6       | 34.6       | 38.9       | 44.7       | 37.5       |
| Congestive heart failure, % | 19.1       | 19.3       | 20.5       | 21.3       | 8.4        |
| Hypertension, %             | 58.7       | 62.4       | 64.8       | 66.4       | 62.9       |
| Diabetes, %                 | 25.2       | 26.0       | 26.4       | 26.3       | 26.5       |
| Chronic lung disease, %     | 18.7       | 20.7       | 22.0       | 23.2       | 19.5       |
| Renal Failure, %            | 3.5        | 4.4        | 5.5        | 10.6       | 11.6       |
| Predicted mortality, %      | 3.8        | 3.8        | 3.9        | 4.4        | 4.3        |
| (95% CI)                    | (3.8-3.8)  | (3.8-3.8)  | (3.9-3.9)  | (4.4-4.4)  | (4.2-4.3)  |

|                                    | Year             |                  |                  |                  |                  |
|------------------------------------|------------------|------------------|------------------|------------------|------------------|
|                                    | 1999-2000        | 2001-2002        | 2003-2004        | 2005-2006        | 2007-2008        |
| <b>Carotid Endarterectomy</b>      |                  |                  |                  |                  |                  |
| Demographics                       |                  |                  |                  |                  |                  |
| Age, mean (SD)                     | 74.6 (7.0)       | 74.7 (7.0)       | 74.7 (7.3)       | 74.7 (7.4)       | 74.7 (7.6)       |
| Female, %                          | 43.5             | 43.3             | 42.9             | 42.9             | 42.5             |
| non-White, %                       | 5.9              | 6.2              | 6.5              | 6.8              | 7.2              |
| Comorbidities                      |                  |                  |                  |                  |                  |
| 3+Comorbidities, %                 | 22.5             | 25.0             | 28.8             | 33.8             | 33.4             |
| Congestive heart failure, %        | 7.6              | 7.6              | 8.1              | 8.5              | 7.0              |
| Hypertension, %                    | 64.4             | 68.6             | 73.0             | 76.0             | 76.9             |
| Diabetes, %                        | 22.3             | 23.3             | 24.8             | 26.2             | 26.9             |
| Chronic lung disease, %            | 16.9             | 18.5             | 20.3             | 22.3             | 21.1             |
| Renal Failure, %                   | 1.9              | 2.3              | 2.7              | 5.7              | 7.8              |
| Predicted mortality, %<br>(95% CI) | 1.2<br>(1.2-1.2) | 1.2<br>(1.2-1.2) | 1.2<br>(1.2-1.3) | 1.3<br>(1.3-1.3) | 1.3<br>(1.3-1.3) |
| <b>Aortic Valve Replacement</b>    |                  |                  |                  |                  |                  |
| Demographics                       |                  |                  |                  |                  |                  |
| Age, mean (SD)                     | 74.7 (8.0)       | 74.8 (8.1)       | 74.8 (8.3)       | 74.9 (8.3)       | 75.1 (8.1)       |
| Female, %                          | 43.5             | 42.9             | 42.4             | 41.7             | 41.4             |
| non-White, %                       | 7.7              | 7.8              | 8.1              | 8.1              | 8.2              |
| Comorbidities                      |                  |                  |                  |                  |                  |
| 3+Comorbidities, %                 | 39.4             | 43.0             | 46.6             | 51.7             | 35.2             |
| Congestive heart failure, %        | 36.9             | 36.6             | 37.0             | 36.6             | 13.5             |
| Hypertension, %                    | 46.1             | 49.9             | 52.1             | 53.3             | 49.8             |
| Diabetes, %                        | 15.3             | 15.8             | 16.7             | 17.0             | 17.1             |
| Chronic lung disease, %            | 18.0             | 19.5             | 19.9             | 21.0             | 16.1             |
| Renal Failure, %                   | 3.9              | 4.8              | 5.8              | 11.4             | 11.4             |
| Predicted mortality, %<br>(95% CI) | 6.8<br>(6.8-6.8) | 6.9<br>(6.8-6.9) | 6.9<br>(6.9-7.0) | 7.6<br>(7.6-7.7) | 7.0<br>(7.0-7.1) |

\*Procedure-specific predicted mortality rates were determined for each patient from analysis of Medicare data from 1999-2000, using a logistic regression model, clustering at the hospital level and controlling for patient characteristics, including age, gender, race, admission acuity, co-morbidities, and socioeconomic status.

Table 3 (Supplement). ICD-9 Procedure and Diagnosis Codes

| <b>ICD-9 Procedure Codes</b>            |                                               |                        |                          |               |                |                |            |
|-----------------------------------------|-----------------------------------------------|------------------------|--------------------------|---------------|----------------|----------------|------------|
| AAA                                     | CABG                                          | Carotid Endarterectomy | Aortic Valve Replacement | Esophagectomy | Pancreatectomy | Lung Resection | Cystectomy |
| 3834                                    | 3510-                                         | 3812                   | 3511                     | 4240          | 5251           | 323            | 577        |
| 3844                                    | 3529                                          |                        | 3521                     | 4241          | 5253           | 3230           | 5771       |
| 3864                                    |                                               |                        | 3522                     | 4242          | 526            | 3239           | 5779       |
| 3925                                    | 3610-                                         |                        |                          | 4399          | 527            | 324            |            |
| 3971                                    | 3619                                          |                        |                          |               |                | 3241           |            |
|                                         |                                               |                        |                          |               |                | 3249           |            |
|                                         |                                               |                        |                          |               |                | 325            |            |
|                                         |                                               |                        |                          |               |                | 3250           |            |
|                                         |                                               |                        |                          |               |                | 3259           |            |
| <b>Exclude if ICD9 Diagnosis code =</b> |                                               |                        |                          |               |                |                |            |
| 4411                                    | Thoracic aneurysm, ruptured                   |                        |                          |               |                |                |            |
| 4412                                    | Thoracic aneurysm without mention of rupture  |                        |                          |               |                |                |            |
| 4413                                    | Abdominal aneurysm, ruptured                  |                        |                          |               |                |                |            |
| 4415                                    | Aortic aneurysm of unspecified site, ruptured |                        |                          |               |                |                |            |
| 4416                                    | Thoraco-abdominal aneurysm, ruptured          |                        |                          |               |                |                |            |
